# Supplementary material for: In vivo depletion of serum IgG by an affibody molecule binding the neonatal Fc receptor
Source: PubMed Central journal article supplement (PMC5865129; doi:10.1038/s41598-018-23481-5), 2018-03-23

***In vivo* depletion of serum IgG by an affibody molecule binding the neonatal Fc receptor.**

Johan Seijsing, Shengze Yu, Fredrik Y Frejd, Ingmarie Höiden-Guthenberg, Torbjörn Gräslund

## Legend to supplementary figures

**Supplementary figure 1.** SDS-PAGE separation of  $Z_{FcRn}$  (lane 1) and  $Z_{FcRn}$ -ABD (lane 2) after purification. Lane M corresponds to the molecular weight marker.

**Supplementary figure 2. Interaction of MSA with FcRn.** The interaction of MSA with human FcRn at different pH was investigated by biosensor analysis. The panels show overlays of representative sensorgrams recorded after injection of 400 nM at pH 6.0 and 7.4.

# Supplementary figure 1

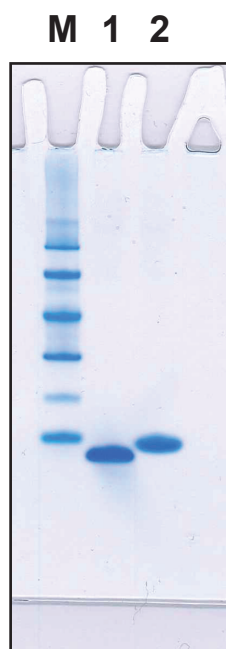

## Supplementary figure 2

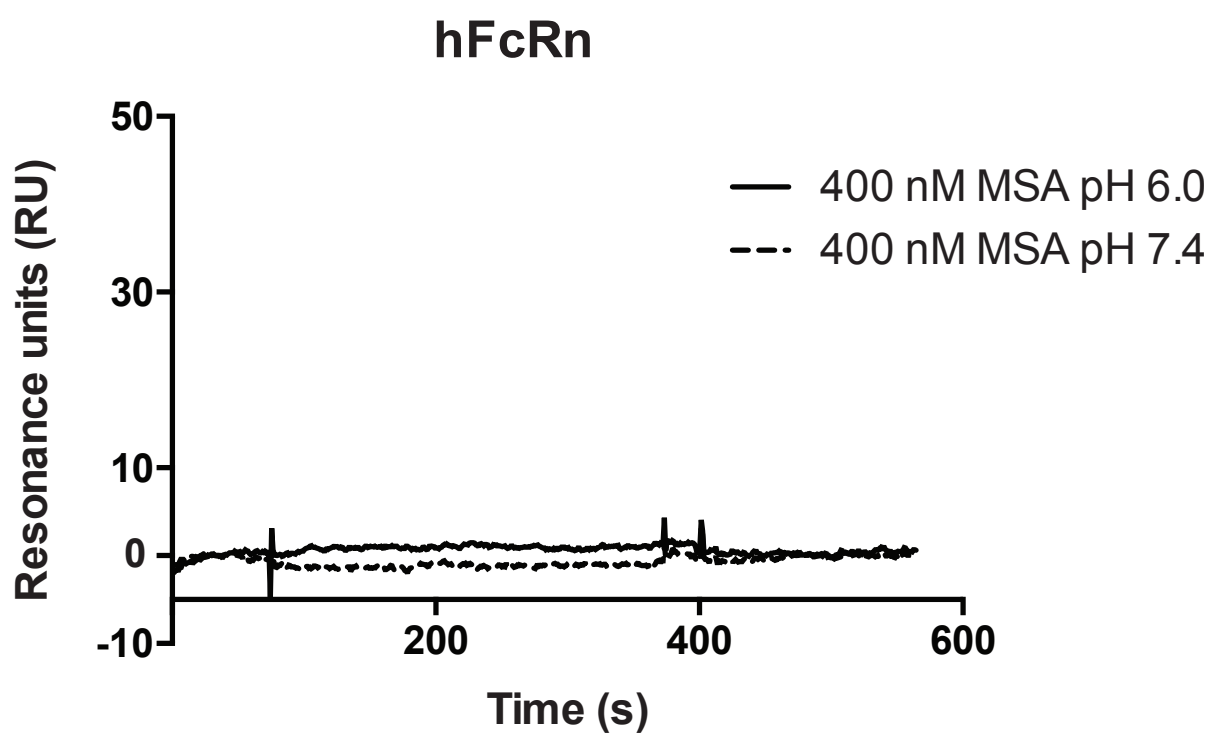

Supplement: 41598_2018_23481_MOESM1_ESM.pdf [file 41598_2018_23481_MOESM1_ESM.pdf]
